# Supplementary material for: 肺癌に伴う呼吸器感染症 : 閉塞性肺炎と非閉塞肺炎症例の比較検討 : 肺癌と呼吸器感染症
Source: Royal Society of Chemistry journal article supplement (doi:10.1039/c9dt04888j), 1995-09-01
Supplement: c9dt04888j1.pdf [file c9dt04888j1.pdf]

## Supporting information

### **3D amorphous NiFe LDH nanosheets electrodeposited on NiCoP@NC in-situ grown on nickel foam for remarkably enhanced OER electrocatalytic performance**

Jianhang Nie, Min Hong, Xiaohua Zhang\*, Junlin Huang, Qin Meng, CuiCui Du\* and Jinhua Chen\*

State Key Laboratory of Chemo/Biosensing and Chemometrics, College of Chemistry and Chemical Engineering, Hunan University, Changsha, 410082, P.R. China

\*Corresponding author. E-mail: mickyxie@hnu.edu.cn (X.H.Zhang), ducc@ hnu.edu.cn (C.C. Du), chenjinhua@hnu.edu.cn (J.H.Chen).

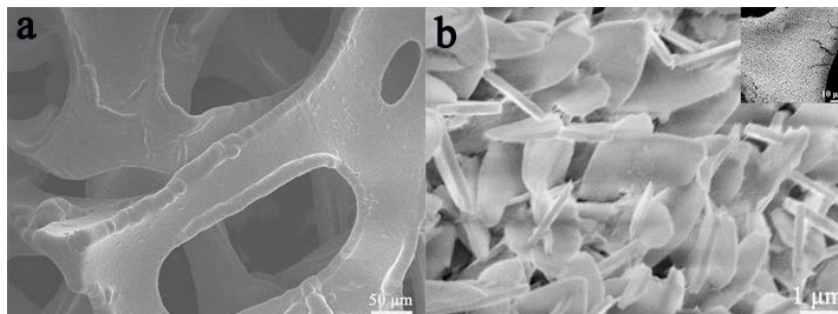

**Figure S1.** SEM images (a) bare Ni Foam and (b) ZIF-67/NF

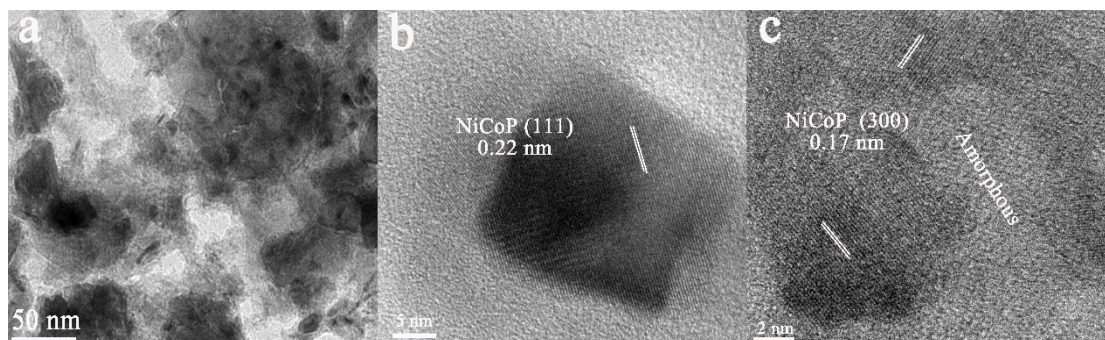

**Figure S2.** TEM images (a) and (b) (c) HRTEM images of NiCoP@NC.

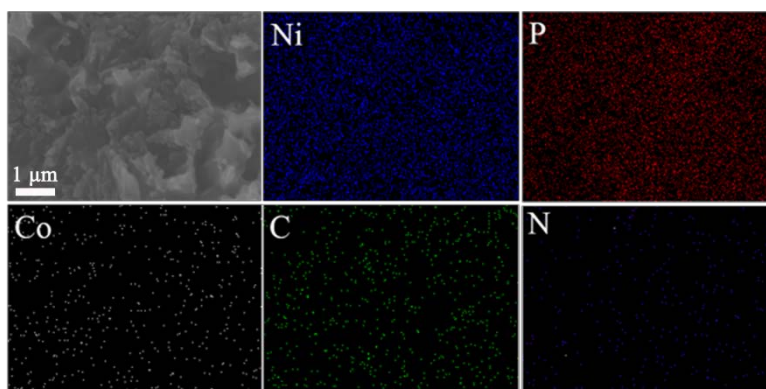

**Figure S3.** SEM elemental mapping images of NiCoP@NC/NF

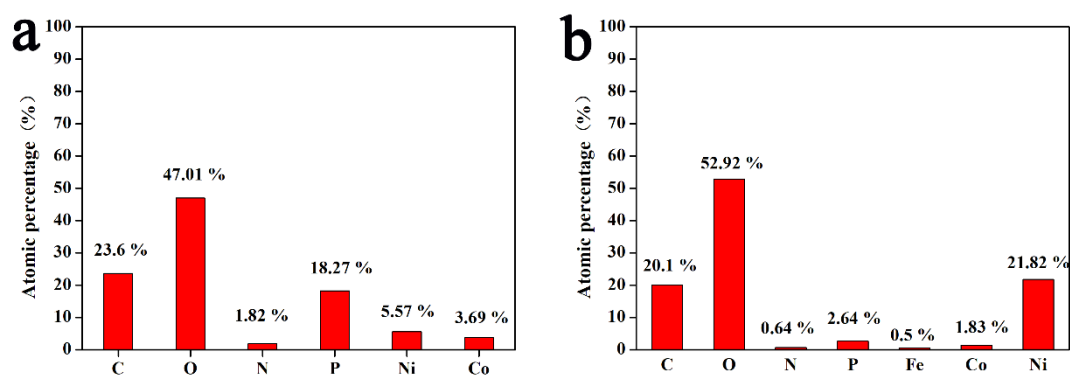

**Figure S4.** Surface atomic relative contents of NiCoP@NC/NF (a), and NiFe LDH/NiCoP@NC/NF (b) based on the XPS measurement.

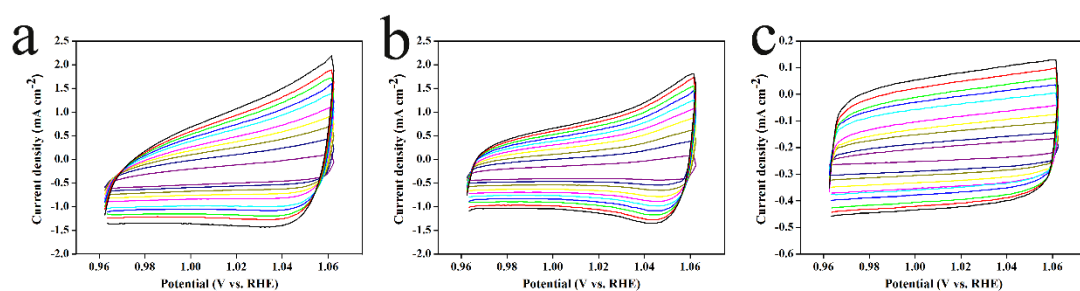

**Figure S5.** Cyclic voltammograms of (a) NiFe LDH/NiCoP@NC/NF, (b) NiCoP@NC/NF, and (c) pure NiFe LDH at scan rates ranging from 10 mV s<sup>-1</sup> to 100 mV s<sup>-1</sup>. The scanning potential range is from 0.96 V to 1.06 V vs RHE.

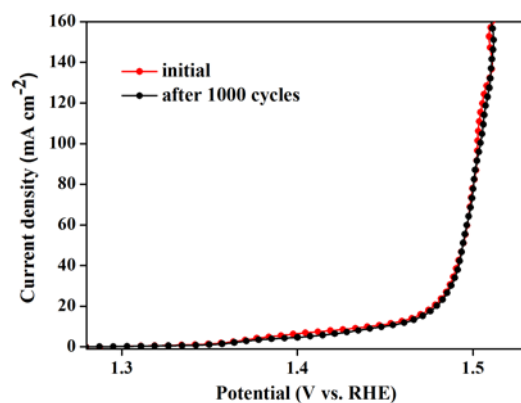

**Figure S6.** LSV polarization curves of the NiFe LDH/NiCoP@NC/NF catalyst before and after 1000 cycles at scan rate of 100 mV s<sup>-1</sup> in 1 M KOH.

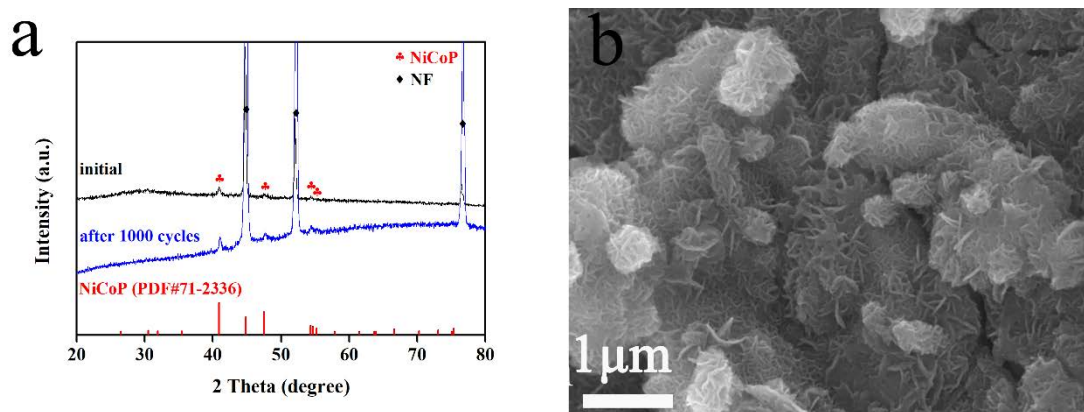

**Figure S7.** XRD pattern and SEM image of NiFe LDH/NiCoP@NC/NF after 1000 cycles at scan rate of 100 mV s<sup>-1</sup> in 1 M KOH

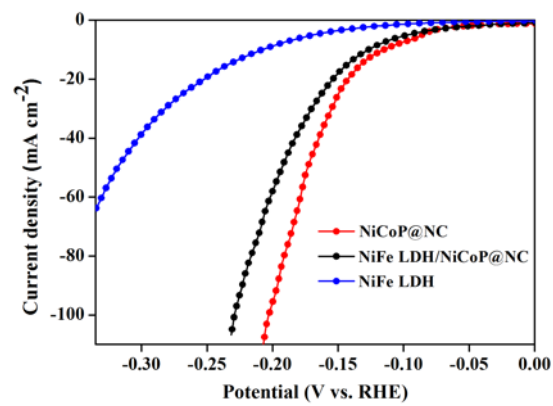

**Figure S8.** Polarization curves for HER in 1.0M KOH of NiFe LDH/NiCoP@NC/NF, NiCoP@NC/NF, and pure NiFe LDH/NF

**Table S1.** Comparison of the OER performance for the NiFe LDH/NiCoP@NC catalyst with other reported OER electrocatalysts in 1 M alkaline media.

| Catalyst              | $\eta_{10}$<br>(mV) | Tafel slope<br>(mV dec <sup>-1</sup> ) | Voltage<br>(V) <sub>@j<sub>10</sub></sub> /cathode | Stability test | Reference |
|-----------------------|---------------------|----------------------------------------|----------------------------------------------------|----------------|-----------|
| NiFeLDH/NiCoP@NC/NF   | 210                 | 35                                     | 1.54//NiCoP@NC/NF                                  | 40h            | This work |
| NiFe LDH/CNT          | 247                 | 31                                     | -                                                  | 1h             | 1         |
| NiCoFe LDH nanoplates | 340                 | 93                                     | -                                                  | 15h            | 2         |
| Porous NiCoFe LDH     | 239                 | 32                                     | 1.55//NiCoFe                                       | 18h            | 3         |

| nanosheets                                                                          | LDH/CFC |      |                                                                         |      |    |
|-------------------------------------------------------------------------------------|---------|------|-------------------------------------------------------------------------|------|----|
| rGO/Ni <sub>2</sub> P/NiOOH                                                         | 283     | 43.6 | -                                                                       | 30   | 4  |
| NiFe LDH/NiFe phosphate                                                             | 290     | 38   | -                                                                       | 10h  | 5  |
| FeNi-P/NF                                                                           | 224     | 72   | 1.57                                                                    |      | 6  |
| CoNi LDH/CoO                                                                        | 300     | 123  | -                                                                       | 36h  | 7  |
| CoCo LDH/CoSe <sub>x</sub>                                                          | 290     | 70   | -                                                                       | 36 h | 8  |
| Ni <sub>0.8</sub> Co <sub>0.1</sub> Fe <sub>0.1</sub> O <sub>x</sub> H <sub>y</sub> | 239     | 45.4 | 1.58//Ni <sub>0.9</sub> Co <sub>0.1</sub> O <sub>x</sub> H <sub>y</sub> | 50 h | 9  |
| CoS <sub>x</sub> /Ni <sub>3</sub> S <sub>2</sub>                                    | 280     | 92   | 1.57//CoS <sub>x</sub> /Ni <sub>3</sub> S <sub>2</sub>                  | 35 h | 10 |
| NiCoPArrays                                                                         | 268     | 71   | 1.57//NiCoP Arrays                                                      | 20 h | 11 |

---

## Reference

- [1] Gong M, Li Y, Wang H, Liang Y, Wu J, Zhou J, Wang J, Regier T, Wei F, Dai H. An Advanced Ni-Fe Layered Double Hydroxide Electrocatalyst for Water Oxidation. *Journal of the American Chemical Society*, 2013, **135** (23), 8452-8455.

- [2] Qian L, Lu Z, Xu T, Wu X, Tian Y, Li Y, Huo Z, Sun X, Duan X. Ternary Layered Double Hydroxides as High-Performance Bifunctional Materials for Oxygen Electrocatalysis. *Advanced Energy Materials*, 2015, **5**(13): 1500245.
- [3] Wang A, Xu H, Li G. NiCoFe Layered Triple Hydroxides with Porous Structures as High-Performance Electrocatalysts for Overall Water Splitting. *Acs Energy Letters*, 2016, **1** (2), 445-453.
- [4] Li P, Chen R, Tian S, Xiong Y. Efficient Oxygen Evolution Catalysis Triggered by Nickel Phosphide Nanoparticles Compositing with Reduced Graphene Oxide with Controlled Architecture. *ACS Sustainable Chemistry & Engineering*, 2019, **7**(10), 9566-9573.
- [5] Li Y, Zhao C. Enhancing Water Oxidation Catalysis on a Synergistic Phosphorylated NiFe Hydroxide by Adjusting Catalyst Wettability. *Acs Catalysis*, 2017, **7**(4), 2535-2541.
- [6] Yan Q, Wei T, Wu J, Yang X, Zhu M, Cheng K, Ye K, Zhu K, Yan J, Cao D, Wang G, Pan Y. Self-Supported FeNi-P Nanosheets with Thin Amorphous Layers for Efficient Electrocatalytic Water Splitting. *ACS Sustainable Chemistry & Engineering*, 2018, **6**(8), 9640-9648.
- [7] Wu J, Ren Z, Du S, Kong L, Liu B, Wang X, Zhu J, Fu H. A highly active oxygen evolution electrocatalyst: Ultrathin CoNi double hydroxide/CoO nanosheets synthesized via interface-directed assembly. *Nano Research*, 2016, **9**(3), 713-725.
- [8] Xue Y, Ren Z, Xie Y, Du S, Wu J, Meng H, Fu H. CoSe<sub>x</sub> nanocrystalline-dotted



CoCo layered double hydroxide nanosheets: a synergetic engineering process for enhanced electrocatalytic water oxidation. *Nanoscale*, 2017, **9**(42), 16256-16263.

[9] Zhao Q, Yang J, Liu M, Wang R, Zhang G, Wang H, Tang H, Liu C, Mei Z, Chen H. Tuning electronic push/pull of Ni-based hydroxides to enhance hydrogen and oxygen evolution reactions for water splitting. *ACS Catalysis*, 2018, **8** (6): 5621-5629.

[10] Subhasis S, Suman C, Wooree J, Chandra M, Hyeyoung K, Pranab S, Tapas K. Cobalt sulfide/nickel sulfide heterostructure directly grown on nickel foam: an efficient and durable electrocatalyst for overall water splitting application. *Acs Applied Materials & Interfaces*, 2018, 10(33): 27712-27722.

[11] Wang J, Hua W, Li M, Liu H, Shao M, Wei B. Structural Engineering Hyperbranched NiCoP Arrays with Superior Electrocatalytic Activities Toward Highly Efficient Overall Water Splitting. *ACS Applied Materials & Interfaces* 2018, **10**(48):41237-41245.
